# Supplementary material for: Expression of the Floral Repressor miRNA156 is Positively Regulated by the AGAMOUS-like Proteins AGL15 and AGL18
Source: PubMed Central journal article supplement — Mol Cells. 2015 Jan 30;38(3):259–66. doi: 10.14348/molcells.2015.2311 (PMC4363726; doi:10.14348/molcells.2015.2311), 2015-01-30
Supplement: molcell-38-3-259-supple.pdf [file molcell-38-3-259-supple.pdf]

**Supple Fig 1.**

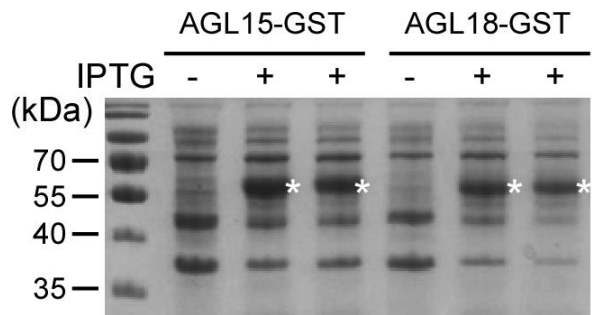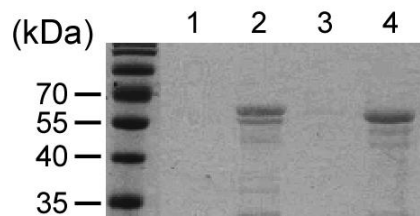

**Supple Fig. 2**

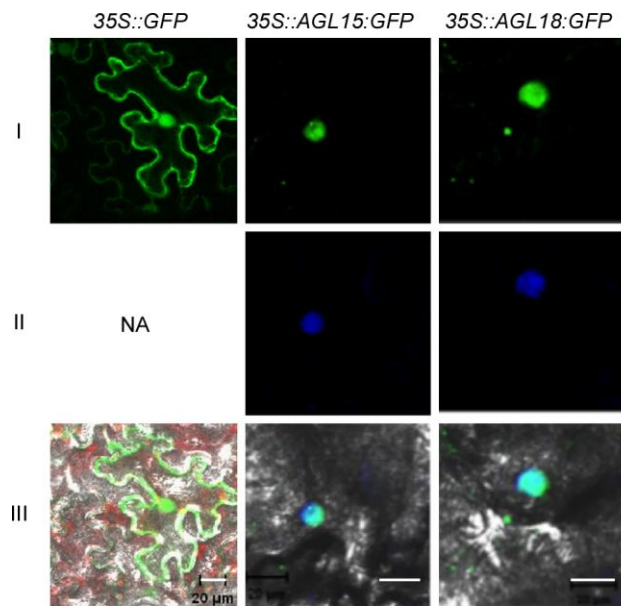

**Table S1** Oligonucleotide sequences used for cloning, RT-PCR, qPCR, and EMSA in this study.

| Gene             | Primer | Purpose      | Sequence (5' to 3')             | Direction  |
|------------------|--------|--------------|---------------------------------|------------|
| AGL15            | JH9253 | Cloning      | catgaattcATGGGTCGTGGA AAA       | Sense      |
|                  | JH9254 | Cloning      | gggggatccCTA AACAGAGAACCT       | Anti-sense |
|                  | JH7294 | qPCR         | TTGAAGAATCACGCTCAAGGAAC         | Sense      |
|                  | JH7295 | qPCR         | AACCTGTCTACGCAAGGTCTCG          | Anti-sense |
|                  | JH7296 | RT-PCR       | AGGACTAAACAGAGAACCTTTGTC        | Anti-sense |
| AGL18            | JH9255 | Cloning      | gtgaattcATGGGGAGAGGAAGGATT      | Sense      |
|                  | JH9256 | Cloning      | cgggatccTCA ATC AGA AGC CAC TTG | Anti-sense |
|                  | JH7250 | qPCR         | TGACGCCGAGGTTGCTCTTATC          | Sense      |
|                  | JH7251 | qPCR         | TTGCTCCATACAGACGCTGGAG          | Anti-sense |
|                  | JH7252 | RT-PCR       | CTGAACCTCTCCCAACATCTC           | Anti-sense |
| AT1G13320 (PP2A) | JH6505 | RT-PCR, qPCR | GCGGTTGTGGAGAACATGATACG         | Sense      |
|                  | JH6506 | RT-PCR, qPCR | GAACCAAACACAATTCGTTGCTG         | Anti-sense |
| AT2G28390        | JH7588 | qPCR         | TTGATCCACTTGCAGACAAGGC          | Sense      |
|                  | JH7589 | qPCR         | TACCCTTTGGCACACCTGATTG          | Anti-sense |
| FT               | JH6488 | qPCR         | AGGCCTTCTCAGGTTCAAACAAGC        | Sense      |
|                  | JH6489 | qPCR         | TGCCAAAGGTTGTCCAGTTGTAGC        | Anti-sense |
| FUL              | JH6325 | qPCR         | ACGGGTCAGCAAGAAGGACA            | Sense      |
|                  | JH4687 | qPCR         | GAGAGTTTGGTTCCGTCACGACGATG      | Anti-sense |
| miR156a CarG I   | JH9341 | EMSA         | TGGTGAAAAACAATTAATAGAAAATTAATT  | Sense      |
|                  | JH9342 | EMSA         | AATTAATTTTCTATTAATTGTTTTTCACCA  | Anti-sense |
| miR156a CarG II  | JH9343 | EMSA         | ATATATCTTCATAATTTTGCAAGTCTTTA   | Sense      |
|                  | JH9344 | EMSA         | TAAAGACTTGCAAAATTATGGAAGATATAT  | Anti-sense |
| miR156a CarG III | JH9345 | EMSA         | ATAATAATAATCTAATTAAAGGAGATGAGA  | Sense      |
|                  | JH9346 | EMSA         | TCTCATCTCCTTTAATTAGATTATTATTAT  | Anti-sense |
| miR156a CarG IV  | JH9347 | EMSA         | CAAGTTCATTGCCATTTTTAGGTCTCTCTA  | Sense      |
|                  | JH9348 | EMSA         | TAGAGAGACCTAAAAATGGCAATGAAGTTG  | Anti-sense |
| miR156a CarG V   | JH9349 | EMSA         | CTTTTTTTTGCTTTTTATGGTTATGTTTTT  | Sense      |
|                  | JH9350 | EMSA         | AAAAACATAACCATAAAAAGCAAAAAAAG   | Anti-sense |
| miR156a NC       | JH9351 | EMSA         | TAAGAGAGATAAAGAAAAGCGACAAGAGCCA | Sense      |
|                  | JH9352 | EMSA         | TGGCTCTTGTGCGCTTTCTTTATCTCTCTTA | Anti-sense |
| miR156c CarG I   | JH9353 | EMSA         | AAAAAAATTGCTATTTTTTGAAAATGTTAC  | Sense      |
|                  | JH9354 | EMSA         | GTAACATTTTCAAAAAATAGCAATTTTTTT  | Anti-sense |
| miR156c CarG II  | JH9355 | EMSA         | TGAATTAATTCTTAAAATTGTGAAATAATT  | Sense      |
|                  | JH9356 | EMSA         | AATTATTTCACAATTTTAAGAATTAATTCA  | Anti-sense |
| miR156c CarG III | JH9357 | EMSA         | TTGTCGTTGCCGTTTATAGGTTATGAGATT  | Sense      |
|                  | JH9358 | EMSA         | AATCTCATAACCTATAAACGGCAACGACAA  | Anti-sense |

|             |        |         |                                |            |
|-------------|--------|---------|--------------------------------|------------|
| miR156c NC  | JH9359 | EMSA    | TTCAGACATCTGTCCCATTGCATGTAAGAG | Sense      |
|             | JH9360 | EMSA    | CTCTTACATGCAATGGGACAGATGTCTGAA | Anti-sense |
| pMIR156b    | TP0001 | Cloning | CCTAATCCAGTGTTATCATGATAC       | Sense      |
|             | TP0002 | Cloning | GATTGAGGAATGCAACAGAGAAGGC      | Anti-sense |
| pri-miR156a | JH6177 | qPCR    | GGACAAGAGAAACGCAAAGAAACTGAC    | Sense      |
|             | JH6178 | qPCR    | AGTGAGCACGCAAGAGAAGCAAG        | Anti-sense |
| pri-miR156c | JH6181 | qPCR    | CTGACAGAAGAGAGTGAGCACACAAAG    | Sense      |
|             | JH6182 | qPCR    | CAGATAGAGCAGTGAGCACGCAAG       | Anti-sense |
| pri-miR156d | JH6183 | qPCR    | CAGAAGAGAGTGAGCACACAAAGGG      | Sense      |
|             | JH6184 | qPCR    | GTGAGCACGCAAAAGCAACCATATAC     | Anti-sense |
| SEP3        | JH2947 | qPCR    | TGCCTTCAAGAGAGGCCTTA           | Sense      |
|             | JH2948 | qPCR    | CATTCCAAAGGCTGGAAGAA           | Anti-sense |
| SPL3        | JH6036 | qPCR    | CTTAGCTGGACACAACGAGAGAAGGC     | Sense      |
|             | JH6037 | qPCR    | GAGAAACAGACAGAGACACAGAGGA      | Anti-sense |

Lowercase letters denote synthetic restriction enzyme sites.
